# Supplementary material for: Joint experimental and theoretical study of PbGa2S4 under compression
Source: Royal Society of Chemistry journal article supplement (doi:10.1039/d3tc02288a), 2023-01-01
Supplement: d3tc02288a1.pdf [file d3tc02288a1.pdf]

# Supporting Information of

## Joint experimental and theoretical study of

### PbGa<sub>2</sub>S<sub>4</sub> under compression

T. Garcia-Sanchez<sup>a</sup>, S. Gallego-Parra<sup>b,\*</sup>, A. Liang<sup>c,\*\*</sup>, J.L Rodrigo- Ramon<sup>c</sup>, A. Muñoz<sup>d</sup>, P. Rodriguez-Hernandez<sup>d</sup>, J. Gonzalez-Platas<sup>d</sup>, J.A Sans<sup>b</sup>, V.P Cuenca-Gotor<sup>b</sup>, Hussien H. Osman, C<sup>c</sup>. Popescu<sup>e</sup>, Veaceslav Ursaki<sup>f</sup>, Ion M. Tiginyanu<sup>f</sup>, D. Errandonea<sup>c</sup> and F.J. Manjón<sup>b</sup>

<sup>a</sup>Departamento de Ingeniería Eléctrica, MALTA Consolider Team, Universitat Politècnica de València, Camino de Vera, s/n., Valencia, 46022, Spain

<sup>b</sup>Instituto de Diseño para la Fabricación y Producción Automatizada, MALTA Consolider Team, Universitat Politècnica de València, Camino de Vera, s/n., Valencia, 46022, Spain

<sup>c</sup>Departamento de Física Aplicada-ICMUV, MALTA Consolider Team, Universitat de Valencia, Dr. Moliner 50, Burjassot, Valencia, 46100, Spain,

<sup>d</sup>Departamento de Física, Instituto de Materiales y Nanotecnología, MALTA Consolider Team, Universidad de La Laguna, La Laguna, Tenerife, 38205, Spain

<sup>e</sup>ALBA-CELLS MALTA Consolider Team Cerdanyola del Valles (Barcelona) Cataluña 08290 Spain

<sup>f</sup>National Center for Materials Study and Testing, Technical University of Moldova, Chisinau MD-2004, Republic of Moldova

Present address: \*, European Synchrotron Radiation Facility, 71 Avenue des Martyrs, 38000 Grenoble, France, and \*\*, Centre for Science at Extreme Conditions and School of Physics and Astronomy, University of Edinburgh, Edinburgh EH9 3FD, United Kingdom.

## 1.- Single crystal XRD measurements at room pressure

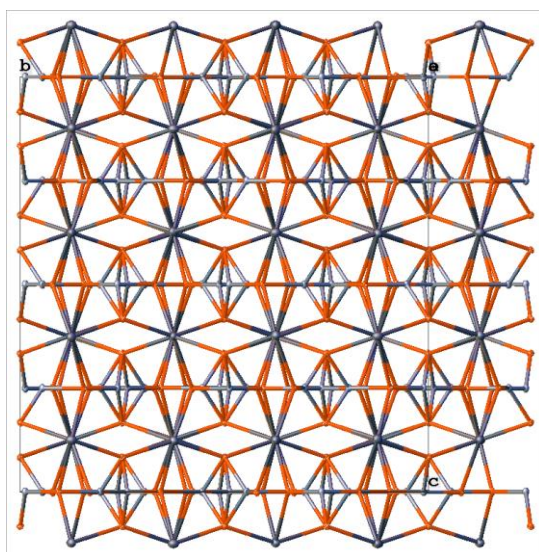

**Figure S1.** Detail of the crystal structure of  $\text{PbGa}_2\text{S}_4$  along the  $b$  and  $c$  axes. Pb, Ga, and S atoms are big gray, small gray, and orange circles, respectively.

**Experimental.** Single orange plate crystals of  $\text{PbGa}_2\text{S}_4$  were used. A suitable crystal with dimensions  $0.12 \times 0.11 \times 0.04 \text{ mm}^3$  was selected and mounted on a SuperNova, Dualflex, EosS2 diffractometer. The crystal was kept at a steady  $T = 293(2) \text{ K}$  during data collection. The diffraction data was collected with the CrysAlis Pro software [S1] and the structure was solved with the ShelXT 2018/2 [S2,S3] solution program using dual methods and by using Olex2 [S4] as the graphical interface. The model was refined with ShelXL 2018/3 using full matrix least squares minimisation on  $F^2$ .

The structure was solved and the space group  $Fddd$  (# 70) determined by the ShelXT 2018/2 [S2,S3] structure solution program using using dual methods and refined by full matrix least squares minimisation on  $F^2$  using version 2018/3 of ShelXL 2018/3 [S2,S3]. All non-hydrogen atoms were refined anisotropically. Sulfur atom positions were calculated geometrically and refined using the riding model.

| Compound                              | $\text{PbGa}_2\text{S}_4$      |
|---------------------------------------|--------------------------------|
| Formula                               | $\text{PbGa}_2\text{S}_4$      |
| $D_{\text{calc.}} / \text{g cm}^{-3}$ | 4.907                          |
| $\mu / \text{mm}^{-1}$                | 35.610                         |
| Formula Weight                        | 474.87                         |
| Colour                                | orange                         |
| Shape                                 | plate                          |
| Size/ $\text{mm}^3$                   | $0.12 \times 0.11 \times 0.04$ |
| $T / \text{K}$                        | 293(2)                         |
| Crystal System                        | orthorhombic                   |
| Space Group                           | $Fddd$                         |
| $a / \text{\AA}$                      | 12.1674(2)                     |
| $b / \text{\AA}$                      | 20.4180(4)                     |
| $c / \text{\AA}$                      | 20.7005(5)                     |
| $\alpha / ^\circ$                     | 90                             |
| $\beta / ^\circ$                      | 90                             |
| $\gamma / ^\circ$                     | 90                             |
| $V / \text{\AA}^3$                    | 5142.71(18)                    |
| $Z$                                   | 32                             |
| $Z'$                                  | 1                              |
| Wavelength/ $\text{\AA}$              | 0.71073                        |
| Radiation type                        | Mo $K_\alpha$                  |
| $\theta_{\text{min}} / ^\circ$        | 2.183                          |
| $\theta_{\text{max}} / ^\circ$        | 28.278                         |
| Measured Refl's.                      | 24555                          |
| Indep't Refl's                        | 1597                           |
| Refl's $I \geq 2 \sigma(I)$           | 1195                           |
| $R_{\text{int}}$                      | 0.0353                         |
| Parameters                            | 66                             |
| Restraints                            | 0                              |
| Largest Peak                          | 1.129                          |
| Deepest Hole                          | -0.841                         |
| Goof                                  | 1.185                          |
| $wR_2$ (all data)                     | 0.0520                         |
| $wR_2$                                | 0.0480                         |
| $R_1$ (all data)                      | 0.0357                         |
| $R_1$                                 | 0.0236                         |

**Table S1:** Anisotropic Displacement Parameters ( $\times 10^4$ ) for  $\text{PbGa}_2\text{S}_4$ . The anisotropic displacement factor exponent takes the form:  $-2\pi^2 [h^2 a^{*2} \times U_{11} + \dots + 2hka^* \times b^* \times U_{12}]$

| Atom | $U_{11}$  | $U_{22}$ | $U_{33}$ | $U_{23}$ | $U_{13}$ | $U_{12}$  |
|------|-----------|----------|----------|----------|----------|-----------|
| Pb3  | 20.4(2)   | 23.2(2)  | 22.7(3)  | 0        | 0        | 0         |
| Pb2  | 15.20(18) | 24.9(2)  | 24.6(2)  | 0        | 0        | 3.29(10)  |
| Pb1  | 15.9(2)   | 33.8(3)  | 22.9(3)  | 0        | 0        | 0         |
| Ga1  | 7.3(2)    | 11.6(2)  | 18.8(3)  | 0.0(2)   | 0.1(2)   | -0.98(18) |
| Ga2  | 7.4(2)    | 12.1(3)  | 19.1(3)  | -0.1(2)  | 0.3(2)   | -0.64(17) |
| S2   | 10.5(5)   | 12.4(5)  | 14.7(5)  | 2.4(8)   | -2.4(8)  | -0.1(4)   |
| S3   | 9.5(4)    | 14.6(5)  | 14.4(5)  | -2.2(8)  | 2.3(8)   | 1.9(4)    |

| Atom | $U_{11}$ | $U_{22}$ | $U_{33}$ | $U_{23}$ | $U_{13}$ | $U_{12}$ |
|------|----------|----------|----------|----------|----------|----------|
| S4   | 5.7(4)   | 10.6(5)  | 18.3(5)  | -1.4(6)  | 0.5(6)   | -0.1(3)  |
| S1   | 7.7(4)   | 10.0(5)  | 21.3(6)  | -0.4(6)  | 1.4(6)   | -1.5(4)  |

**Table S2:** Bond Lengths in Å for PbGa<sub>2</sub>S<sub>4</sub>.

| Atom | Atom             | Length/Å   |
|------|------------------|------------|
| Pb3  | S3 <sup>1</sup>  | 3.0918(19) |
| Pb3  | S3 <sup>2</sup>  | 3.0918(19) |
| Pb3  | S3 <sup>3</sup>  | 3.0918(19) |
| Pb3  | S3 <sup>4</sup>  | 3.0918(19) |
| Pb3  | S4 <sup>5</sup>  | 3.0801(19) |
| Pb3  | S4 <sup>6</sup>  | 3.0801(19) |
| Pb3  | S4 <sup>7</sup>  | 3.0801(19) |
| Pb3  | S4               | 3.0802(19) |
| Pb2  | S2 <sup>8</sup>  | 3.0772(18) |
| Pb2  | S2 <sup>9</sup>  | 3.0772(18) |
| Pb2  | S3 <sup>10</sup> | 3.1117(18) |
| Pb2  | S3 <sup>11</sup> | 3.1117(18) |
| Pb2  | S4 <sup>10</sup> | 3.0769(19) |
| Pb2  | S4 <sup>11</sup> | 3.0769(19) |
| Pb2  | S1 <sup>12</sup> | 3.059(2)   |
| Pb2  | S1               | 3.059(2)   |
| Pb1  | S2 <sup>6</sup>  | 3.0973(19) |
| Pb1  | S2 <sup>13</sup> | 3.0973(19) |
| Pb1  | S2               | 3.0974(19) |

| Atom | Atom             | Length/Å   |
|------|------------------|------------|
| Pb1  | S2 <sup>12</sup> | 3.0973(19) |
| Pb1  | S1 <sup>12</sup> | 3.076(2)   |
| Pb1  | S1 <sup>6</sup>  | 3.076(2)   |
| Pb1  | S1               | 3.076(2)   |
| Pb1  | S1 <sup>13</sup> | 3.0762(19) |
| Ga1  | S2 <sup>8</sup>  | 2.3026(16) |
| Ga1  | S2               | 2.2952(16) |
| Ga1  | S4               | 2.2443(11) |
| Ga1  | S1               | 2.3010(12) |
| Ga2  | S3               | 2.2987(16) |
| Ga2  | S3 <sup>4</sup>  | 2.3031(16) |
| Ga2  | S4 <sup>9</sup>  | 2.3023(12) |
| Ga2  | S1               | 2.2451(12) |

-----  
<sup>1</sup>1/4+x,1-y,1/4+z; <sup>2</sup>3/2-x,-1/4+y,1/4+z; <sup>3</sup>1/4+x,-1/4+y,1/2-z; <sup>4</sup>3/2-x,1-y,1/2-z; <sup>5</sup>7/4-x,y,3/4-z; <sup>6</sup>+x,3/4-y,3/4-z; <sup>7</sup>7/4-x,3/4-y,+z; <sup>8</sup>1-x,1/2-y,1/2-z; <sup>9</sup>-1/4+x,1/4+y,1/2-z; <sup>10</sup>5/4-x,y,1/4-z; <sup>11</sup>-1/2+x,3/4-y,1/4-z; <sup>12</sup>3/4-x,3/4-y,+z; <sup>13</sup>3/4-x,+y,3/4-z

**Table S3:** Bond Angles (in °) for PbGa<sub>2</sub>S<sub>4</sub>.

| Atom            | Atom | Atom             | Angle     |
|-----------------|------|------------------|-----------|
| S3 <sup>1</sup> | Pb3  | S3 <sup>2</sup>  | 147.38(4) |
| S3 <sup>3</sup> | Pb3  | S3 <sup>4</sup>  | 147.38(4) |
| S3 <sup>1</sup> | Pb3  | S3 <sup>4</sup>  | 68.51(7)  |
| S3 <sup>2</sup> | Pb3  | S3 <sup>3</sup>  | 68.51(7)  |
| S3 <sup>1</sup> | Pb3  | S3 <sup>3</sup>  | 121.60(7) |
| S3 <sup>2</sup> | Pb3  | S3 <sup>4</sup>  | 121.60(7) |
| S4 <sup>5</sup> | Pb3  | S3 <sup>2</sup>  | 73.89(3)  |
| S4              | Pb3  | S3 <sup>3</sup>  | 73.89(3)  |
| S4 <sup>5</sup> | Pb3  | S3 <sup>3</sup>  | 77.00(3)  |
| S4 <sup>6</sup> | Pb3  | S3 <sup>4</sup>  | 77.00(3)  |
| S4 <sup>5</sup> | Pb3  | S3 <sup>1</sup>  | 78.54(3)  |
| S4 <sup>7</sup> | Pb3  | S3 <sup>3</sup>  | 78.54(3)  |
| S4 <sup>6</sup> | Pb3  | S3 <sup>1</sup>  | 73.89(3)  |
| S4 <sup>7</sup> | Pb3  | S3 <sup>2</sup>  | 134.53(3) |
| S4              | Pb3  | S3 <sup>4</sup>  | 78.54(3)  |
| S4 <sup>5</sup> | Pb3  | S3 <sup>4</sup>  | 134.53(3) |
| S4              | Pb3  | S3 <sup>1</sup>  | 134.53(3) |
| S4 <sup>6</sup> | Pb3  | S3 <sup>2</sup>  | 78.54(3)  |
| S4 <sup>6</sup> | Pb3  | S3 <sup>3</sup>  | 134.53(3) |
| S4              | Pb3  | S3 <sup>2</sup>  | 77.00(3)  |
| S4 <sup>7</sup> | Pb3  | S3 <sup>4</sup>  | 73.89(3)  |
| S4 <sup>7</sup> | Pb3  | S3 <sup>1</sup>  | 77.00(3)  |
| S4 <sup>5</sup> | Pb3  | S4               | 144.60(5) |
| S4 <sup>7</sup> | Pb3  | S4               | 64.02(5)  |
| S4 <sup>6</sup> | Pb3  | S4               | 128.53(5) |
| S4 <sup>5</sup> | Pb3  | S4 <sup>7</sup>  | 128.52(5) |
| S4 <sup>5</sup> | Pb3  | S4 <sup>6</sup>  | 64.02(5)  |
| S4 <sup>6</sup> | Pb3  | S4 <sup>7</sup>  | 144.60(5) |
| S2 <sup>8</sup> | Pb2  | S2 <sup>9</sup>  | 149.22(5) |
| S2 <sup>9</sup> | Pb2  | S3 <sup>10</sup> | 68.90(6)  |
| S2 <sup>8</sup> | Pb2  | S3 <sup>10</sup> | 121.04(6) |

| Atom             | Atom | Atom             | Angle     |
|------------------|------|------------------|-----------|
| S2 <sup>9</sup>  | Pb2  | S3 <sup>11</sup> | 121.04(6) |
| S2 <sup>8</sup>  | Pb2  | S3 <sup>11</sup> | 68.90(6)  |
| S3 <sup>10</sup> | Pb2  | S3 <sup>11</sup> | 145.88(5) |
| S4 <sup>10</sup> | Pb2  | S2 <sup>9</sup>  | 133.70(3) |
| S4 <sup>11</sup> | Pb2  | S2 <sup>9</sup>  | 76.05(3)  |
| S4 <sup>10</sup> | Pb2  | S2 <sup>8</sup>  | 76.05(3)  |
| S4 <sup>11</sup> | Pb2  | S2 <sup>8</sup>  | 133.70(3) |
| S4 <sup>10</sup> | Pb2  | S3 <sup>10</sup> | 77.67(3)  |
| S4 <sup>11</sup> | Pb2  | S3 <sup>10</sup> | 73.52(3)  |
| S4 <sup>10</sup> | Pb2  | S3 <sup>11</sup> | 73.52(3)  |
| S4 <sup>11</sup> | Pb2  | S3 <sup>11</sup> | 77.67(3)  |
| S4 <sup>10</sup> | Pb2  | S4 <sup>11</sup> | 64.10(5)  |
| S1 <sup>12</sup> | Pb2  | S2 <sup>9</sup>  | 81.89(4)  |
| S1 <sup>12</sup> | Pb2  | S2 <sup>8</sup>  | 72.40(3)  |
| S1               | Pb2  | S2 <sup>8</sup>  | 81.89(4)  |
| S1               | Pb2  | S2 <sup>9</sup>  | 72.41(3)  |
| S1 <sup>12</sup> | Pb2  | S3 <sup>10</sup> | 79.97(4)  |
| S1               | Pb2  | S3 <sup>11</sup> | 79.97(4)  |
| S1               | Pb2  | S3 <sup>10</sup> | 131.63(4) |
| S1 <sup>12</sup> | Pb2  | S3 <sup>11</sup> | 131.62(4) |
| S1               | Pb2  | S4 <sup>10</sup> | 150.17(3) |
| S1               | Pb2  | S4 <sup>11</sup> | 123.26(4) |
| S1 <sup>12</sup> | Pb2  | S4 <sup>10</sup> | 123.26(4) |
| S1 <sup>12</sup> | Pb2  | S4 <sup>11</sup> | 150.17(3) |
| S1 <sup>12</sup> | Pb2  | S1               | 66.72(6)  |
| S2 <sup>13</sup> | Pb1  | S2               | 69.11(7)  |
| S2 <sup>6</sup>  | Pb1  | S2               | 120.74(7) |
| S2 <sup>12</sup> | Pb1  | S2               | 147.72(4) |
| S2 <sup>6</sup>  | Pb1  | S2 <sup>12</sup> | 69.11(7)  |
| S2 <sup>6</sup>  | Pb1  | S2 <sup>13</sup> | 147.71(4) |
| S2 <sup>13</sup> | Pb1  | S2 <sup>12</sup> | 120.74(7) |

$x, 3/4-y, +z; {}^{133}/4-x, +y, 3/4-z$

| Atom              | Atom | Atom              | Angle     |
|-------------------|------|-------------------|-----------|
| S1 <sup>6</sup>   | Pb1  | S2 <sup>6</sup>   | 71.58(3)  |
| S1                | Pb1  | S2 <sup>6</sup>   | 79.29(3)  |
| S1                | Pb1  | S2                | 71.58(3)  |
| S1 <sup>12</sup>  | Pb1  | S2 <sup>12</sup>  | 71.58(3)  |
| S1 <sup>12</sup>  | Pb1  | S2 <sup>13</sup>  | 79.29(3)  |
| S1 <sup>13</sup>  | Pb1  | S2 <sup>12</sup>  | 79.29(3)  |
| S1 <sup>6</sup>   | Pb1  | S2 <sup>13</sup>  | 81.40(3)  |
| S1 <sup>13</sup>  | Pb1  | S2 <sup>6</sup>   | 81.40(3)  |
| S1 <sup>12</sup>  | Pb1  | S2                | 81.40(3)  |
| S1 <sup>6</sup>   | Pb1  | S2 <sup>12</sup>  | 130.64(4) |
| S1 <sup>13</sup>  | Pb1  | S2                | 130.64(4) |
| S1                | Pb1  | S2 <sup>13</sup>  | 130.64(4) |
| S1 <sup>13</sup>  | Pb1  | S2 <sup>13</sup>  | 71.58(3)  |
| S1 <sup>6</sup>   | Pb1  | S2                | 79.29(3)  |
| S1                | Pb1  | S2 <sup>12</sup>  | 81.40(3)  |
| S1 <sup>12</sup>  | Pb1  | S2 <sup>6</sup>   | 130.64(4) |
| S1 <sup>6</sup>   | Pb1  | S1 <sup>13</sup>  | 66.30(6)  |
| S1 <sup>13</sup>  | Pb1  | S1                | 156.51(4) |
| S1 <sup>6</sup>   | Pb1  | S1                | 119.00(5) |
| S1 <sup>12</sup>  | Pb1  | S1 <sup>6</sup>   | 156.51(4) |
| S1 <sup>12</sup>  | Pb1  | S1 <sup>13</sup>  | 119.00(5) |
| S1 <sup>12</sup>  | Pb1  | S1                | 66.30(6)  |
| S2                | Ga1  | S2 <sup>9</sup>   | 97.35(4)  |
| S2                | Ga1  | S1                | 103.54(7) |
| S4                | Ga1  | S2 <sup>9</sup>   | 123.09(7) |
| S4                | Ga1  | S2                | 123.61(7) |
| S4                | Ga1  | S1                | 102.62(4) |
| S1                | Ga1  | S2 <sup>9</sup>   | 103.87(7) |
| S3                | Ga2  | S3 <sup>4</sup>   | 96.70(4)  |
| S3                | Ga2  | S4 <sup>8</sup>   | 107.46(7) |
| S4 <sup>8</sup>   | Ga2  | S3 <sup>4</sup>   | 107.06(7) |
| S1                | Ga2  | S3                | 120.92(7) |
| S1                | Ga2  | S3 <sup>4</sup>   | 121.33(7) |
| S1                | Ga2  | S4 <sup>8</sup>   | 102.42(4) |
| Pb2 <sup>9</sup>  | S2   | Pb1               | 148.47(4) |
| Ga1               | S2   | Pb2 <sup>9</sup>  | 112.28(7) |
| Ga1 <sup>9</sup>  | S2   | Pb2 <sup>9</sup>  | 91.35(6)  |
| Ga1               | S2   | Pb1               | 91.99(6)  |
| Ga1 <sup>9</sup>  | S2   | Pb1               | 112.26(7) |
| Ga1               | S2   | Ga1 <sup>9</sup>  | 82.65(4)  |
| Pb3 <sup>4</sup>  | S3   | Pb2 <sup>11</sup> | 146.63(4) |
| Ga2               | S3   | Pb3 <sup>4</sup>  | 88.97(6)  |
| Ga2 <sup>4</sup>  | S3   | Pb3 <sup>4</sup>  | 116.12(7) |
| Ga2               | S3   | Pb2 <sup>11</sup> | 116.97(7) |
| Ga2 <sup>4</sup>  | S3   | Pb2 <sup>11</sup> | 88.98(6)  |
| Ga2               | S3   | Ga2 <sup>4</sup>  | 83.30(4)  |
| Pb2 <sup>11</sup> | S4   | Pb3               | 115.94(3) |
| Ga1               | S4   | Pb3               | 118.92(8) |
| Ga1               | S4   | Pb2 <sup>11</sup> | 120.06(8) |
| Ga1               | S4   | Ga2 <sup>3</sup>  | 112.76(5) |
| Ga2 <sup>3</sup>  | S4   | Pb3               | 89.19(5)  |
| Ga2 <sup>3</sup>  | S4   | Pb2 <sup>11</sup> | 89.85(5)  |
| Pb2               | S1   | Pb1               | 113.49(3) |
| Ga1               | S1   | Pb2               | 91.84(6)  |
| Ga1               | S1   | Pb1               | 92.42(6)  |
| Ga2               | S1   | Pb2               | 119.41(8) |
| Ga2               | S1   | Pb1               | 119.40(8) |
| Ga2               | S1   | Ga1               | 112.57(5) |

-----  
<sup>1</sup>1/4+x, 1-y, 1/4+z; <sup>2</sup>3/2-x, -1/4+y, 1/4+z; <sup>3</sup>1/4+x, -1/4+y, 1/2-z; <sup>4</sup>3/2-x, 1-y, 1/2-z; <sup>5</sup>7/4-x, +y, 3/4-z; <sup>6</sup>+x, 3/4-y, 3/4-z; <sup>7</sup>7/4-x, 3/4-y, +z; <sup>8</sup>-1/4+x, 1/4+y, 1/2-z; <sup>9</sup>1-x, 1/2-y, 1/2-z; <sup>10</sup>-1/2+x, 3/4-y, 1/4-z; <sup>11</sup>5/4-x, +y, 1/4-z; <sup>12</sup>3/4-

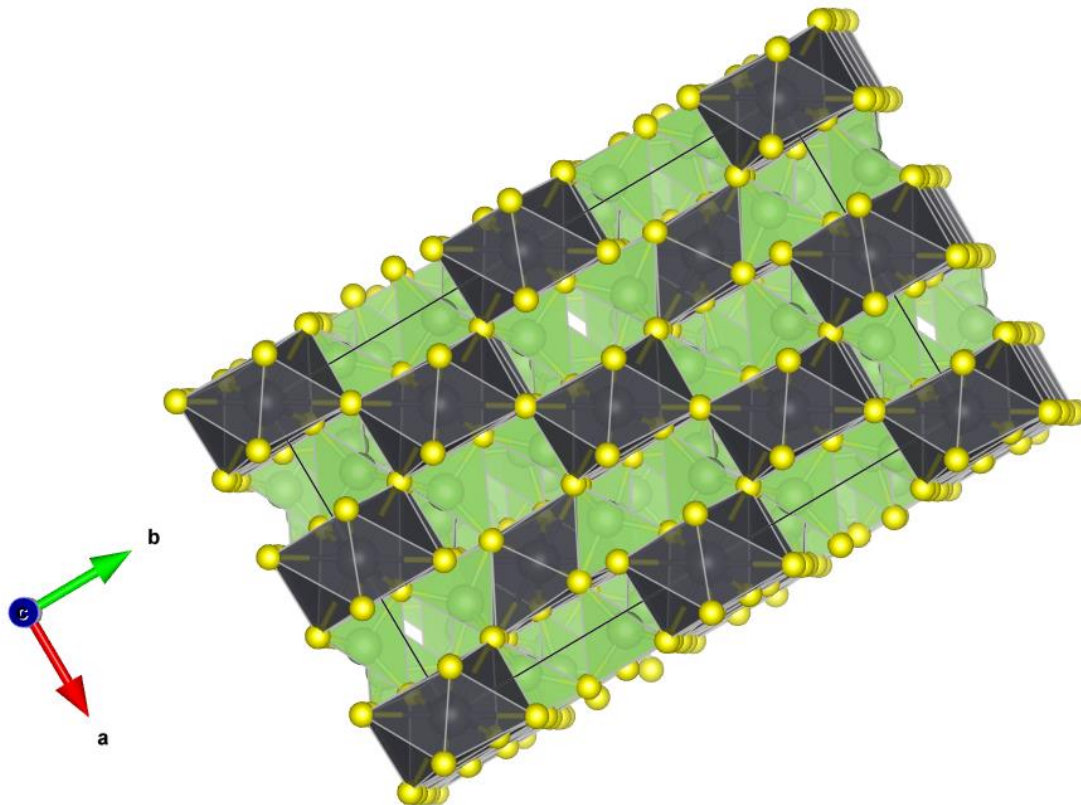

**Figure S2.** Detail of the crystal structure of  $\text{PbGa}_2\text{S}_4$  in a perspective that highlights its layered characteristic.  $\text{GaS}_4$  tetrahedra are shown in green and  $\text{PbS}_8$  square antiprismatic polyhedra is black. Sulfur atoms are shown in yellow.

## 2.- RS measurements at room pressure

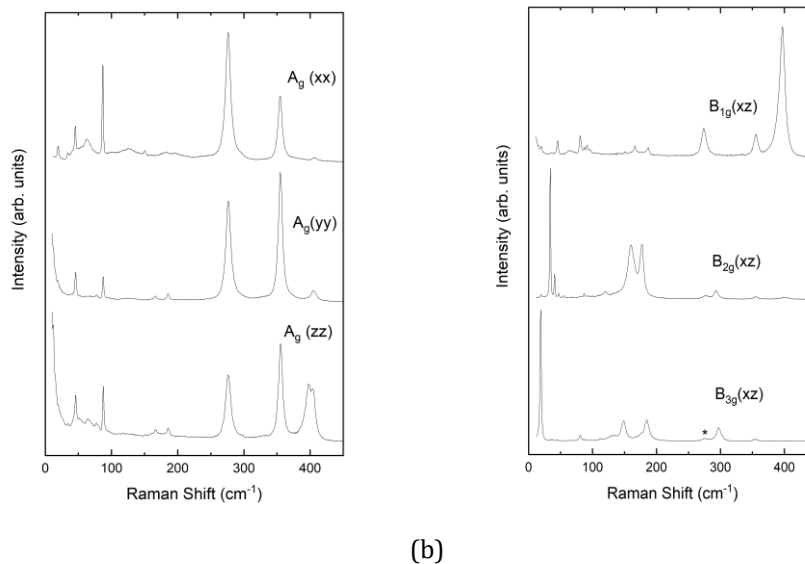

**Figure S3.** Normalized Raman spectra of  $\text{PbGa}_2\text{S}_4$  at room pressure. (a) Modes with  $A_g$  symmetry. (b) Modes with  $B_g$  symmetry. The asterisk in the Raman spectrum corresponding to the  $B_{3g}$  symmetry is related to an  $A_g$  (xx) mode.

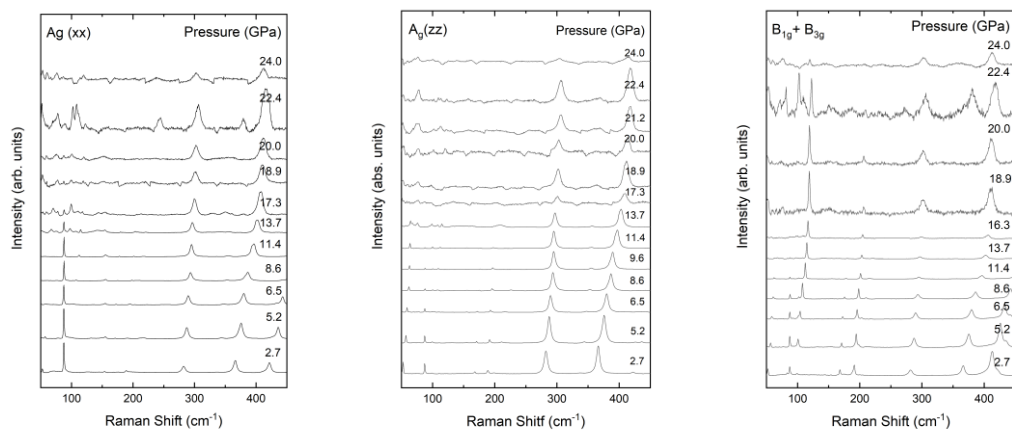

**Figure S4.** Normalized polarized Raman spectra of  $\text{PbGa}_2\text{S}_4$  at high pressure up to 24 GPa.

**Table S4**

Raman-active frequencies of  $A_g$ ,  $B_{1g}$ ,  $B_{2g}$  and  $B_{3g}$  modes in  $\text{PbGa}_2\text{S}_4$  at room pressure obtained from polarized RS measurements. Data from Ref. Kamenshchikov et al. (2007) (noted with subindex k) are provided for comparison.

| $A_{gk}$ | $A_g$ | $B_{1gk}$ | $B_{1g}$ | $B_{2gk}$ | $B_{2g}$ | $B_{3gk}$ | $B_{3g}$ |
|----------|-------|-----------|----------|-----------|----------|-----------|----------|
|          | 12.2  |           | 20       | 19.7      | 20       | 19        |          |
|          | 19.7  | 25        |          | 34        | 33.9     | 31        | 34       |
|          | 20.3  | 35        | 34.3     | 41        | 40.7     |           |          |
|          | 22.4  | 42        |          | 47        | 47.2     | 47        | 45       |
|          | 25    | 46        | 45.6     | 55        | 55.0     | 55        |          |
|          | 34.1  | 67        | 65       | 89        | 86.5     | 89        | 81       |
|          | 34.9  | 83        | 80.5     | 121       | 121      |           | 112      |
|          | 45.5  |           | 87       | 160       | 160.8    | 132       | 131      |
| 46       | 46.2  | 93        | 91.2     | 176       | 177.0    | 150       | 149      |
| 53       | 51.9  | 98        | 96.5     |           | 277.0    | 175       | 179      |
|          | 62.7  | 152       |          | 293       | 293.1    | 187       | 184      |
| 67       | 64.0  | 161       | 166.2    | 362       | 354.8    | 280       | 277      |
| 80       | 77.0  | 167       |          |           | 398.6    | 298       | 297      |
|          | 86.8  | 178       |          |           |          | 336       | 330      |
| 88       | 87.6  | 187       | 187.2    |           |          | 345       | 355      |
| 118      |       | 274       | 273.7    |           |          |           |          |
| 127      | 125.7 | 292       |          |           |          |           |          |
| 159      | 150.8 | 321       |          |           |          |           |          |
| 166      | 166.6 | 356       | 355      |           |          |           |          |
| 172      |       | 398       | 396.9    |           |          |           |          |
|          | 182.0 |           |          |           |          |           |          |
| 185      | 185.4 |           |          |           |          |           |          |
|          | 198.5 |           |          |           |          |           |          |
| 277      | 276.4 |           |          |           |          |           |          |
| 332      |       |           |          |           |          |           |          |
| 353      | 355.0 |           |          |           |          |           |          |
|          | 397.8 |           |          |           |          |           |          |
| 404      | 404.1 |           |          |           |          |           |          |

**Table S5**

Theoretical Raman-active frequencies at zero pressure ( $\omega_0$ , in  $cm^{-1}$ ) and pressure coefficients ( $a_1$ , in  $cm^{-1}GPa^{-1}$ ;  $a_2$ , in  $cm^{-1}GPa^{-2}$ ) in  $PbGa_2S_4$  according to fits to  $\omega_0 + a_1 \cdot P + a_2 \cdot P^2$ .

| Mode          | $\omega_0$ | $a_1$   | $a_2$   | Mode          | $\omega_0$ | $a_1$  | $a_2$   |
|---------------|------------|---------|---------|---------------|------------|--------|---------|
| $B_{2g}^1$    | 17.7(2)    | 3.81(0) | -0.1(0) | $B_{2g}^{12}$ | 162.9(2)   | 3.3(0) | 0.0(0)  |
| $B_{1g}^1$    | 30.4(1)    | 2.2(0)  | -0.1(0) | $B_{2g}^{13}$ | 167.1(1)   | 4.1(0) | 0.0(0)  |
| $B_{3g}^1$    | 33.8(1)    | 0.7(0)  | -0.1(0) | $B_{3g}^{13}$ | 167.3(1)   | 4.4(0) | 0.0(0)  |
| $B_{2g}^2$    | 36.46(1)   | 1.8(0)  | 0.0(0)  | $B_{2g}^{14}$ | 169.7(1)   | 4.3(0) | 0.0(0)  |
| $B_{3g}^2$    | 39.2(0)    | 1.6(0)  | -0.1(0) | $B_{3g}^{14}$ | 173.9(0)   | 5.8(0) | 0.0(0)  |
| $B_{1g}^2$    | 43.6(1)    | 2.4(0)  | 0.0(0)  | $A_g^9$       | 170.5(2)   | 3.2(0) | 0.0(0)  |
| $A_g^1$       | 44.0(1)    | 2.4(0)  | -0.1(0) | $B_{1g}^{12}$ | 174.2(1)   | 3.3(0) | 0.0(0)  |
| $B_{3g}^3$    | 46.4(0)    | 1.8(0)  | 0.0(0)  | $B_{1g}^{13}$ | 179.6(0)   | 5.3(0) | 0.0(0)  |
| $B_{2g}^3$    | 50.5(0)    | 1.8(0)  | 0.0(0)  | $A_g^{10}$    | 182.3(0)   | 5.4(0) | 0.0(0)  |
| $B_{3g}^4$    | 53.8(0)    | 1.7(0)  | 0.0(0)  | $A_g^{11}$    | 195.5(0)   | 4.8(0) | 0.0(0)  |
| $B_{2g}^4$    | 64.3(0)    | 2.7(0)  | 0.0(0)  | $B_{1g}^{14}$ | 262.9(0)   | 2.2(0) | 0.0(0)  |
| $B_{3g}^5$    | 79.1(2)    | 1.8(0)  | -0.1(0) | $A_g^{12}$    | 266.0(0)   | 2.0(0) | 0.0(0)  |
| $B_{2g}^5$    | 77.8(1)    | 2.1(0)  | 0.0(0)  | $B_{3g}^{15}$ | 266.3(0)   | 3.4(0) | 0.0(0)  |
| $B_{1g}^3$    | 78.6(0)    | 0.6(0)  | 0.0(0)  | $B_{1g}^{15}$ | 272.1(0)   | 3.7(0) | 0.0(0)  |
| $B_{1g}^4$    | 81.68(0)   | 0.7(0)  | 0.0(0)  | $B_{2g}^{15}$ | 274.6(0)   | 3.7(0) | 0.0(0)  |
| $A_g^2$       | 84.3(0)    | 0.1(0)  | 0.0(0)  | $B_{1g}^{16}$ | 276.0(0)   | 4.1(0) | 0.0(0)  |
| $A_g^3$       | 88.7(1)    | 1.1(0)  | 0.0(0)  | $B_{3g}^{16}$ | 276.4(0)   | 4.3(0) | -0.1(0) |
| $B_{1g}^5$    | 88.8(1)    | 1.3(0)  | 0.0(0)  | $A_g^{13}$    | 278.8(0)   | 4.0(0) | 0.0(0)  |
| $B_{1g}^6$    | 89.8(0)    | 1.9(0)  | 0.0(0)  | $B_{2g}^{16}$ | 278.9(0)   | 4.5(0) | -0.1(0) |
| $A_g^4$       | 91.6(0)    | 1.1(0)  | 0.0(0)  | $A_g^{14}$    | 283.3(0)   | 5.1(0) | -0.1(0) |
| $B_{3g}^6$    | 98.1(0)    | -0.6(0) | 0.0(0)  | $B_{2g}^{17}$ | 292.0(0)   | 3.1(0) | 0.0(0)  |
| $B_{3g}^7$    | 108.3(0)   | -0.4(0) | 0.0(0)  | $B_{3g}^{17}$ | 292.1(0)   | 3.2(0) | 0.0(0)  |
| $B_{2g}^6$    | 107.4(0)   | -0.7(0) | 0.0(0)  | $B_{3g}^{18}$ | 292.7(0)   | 3.1(0) | 0.0(0)  |
| $B_{2g}^7$    | 110.4(0)   | -0.7(0) | 0.0(0)  | $B_{2g}^{18}$ | 293.3(0)   | 3.0(0) | 0.0(0)  |
| $B_{3g}^8$    | 112.7(0)   | 0.0(0)  | 0.0(0)  | $A_g^{15}$    | 320.0(1)   | 2.4(0) | 0.0(0)  |
| $B_{2g}^8$    | 113.7(0)   | -0.1(0) | 0.0(0)  | $B_{1g}^{17}$ | 318.9(0)   | 3.0(0) | 0.0(0)  |
| $B_{3g}^9$    | 114.7(2)   | 7.7(0)  | -0.2(0) | $B_{3g}^{19}$ | 334.4(0)   | 3.0(0) | 0.0(0)  |
| $B_{2g}^9$    | 128.8(3)   | 6.2(0)  | -0.2(0) | $B_{1g}^{18}$ | 334.9(0)   | 3.5(0) | 0.0(0)  |
| $B_{2g}^{10}$ | 144.7(2)   | 4.7(0)  | -0.1(0) | $A_g^{16}$    | 335.9(0)   | 3.5(0) | 0.0(0)  |
| $B_{1g}^7$    | 145.4(1)   | 0.8(0)  | 0.0(0)  | $A_g^{17}$    | 336.9(0)   | 4.0(0) | 0.0(0)  |
| $A_g^5$       | 145.5(1)   | 0.1(0)  | 0.0(0)  | $B_{2g}^{19}$ | 337.1(0)   | 3.0(0) | 0.0(0)  |
| $A_g^6$       | 148.7(1)   | 2.6(0)  | 0.0(0)  | $B_{1g}^{19}$ | 338.1(0)   | 3.9(0) | 0.0(0)  |



|               |          |        |         |               |          |        |         |
|---------------|----------|--------|---------|---------------|----------|--------|---------|
| $B_{1g}^8$    | 151.5(1) | 2.2(0) | 0.0(0)  | $B_{3g}^{20}$ | 338.1(0) | 3.2(0) | 0.0(0)  |
| $B_{3g}^{10}$ | 153.5(2) | 3.7(0) | -0.1(0) | $B_{2g}^{20}$ | 339.1(0) | 3.2(0) | 0.0(0)  |
| $A_g^7$       | 149.7(1) | 4.2(0) | -0.1(0) | $B_{3g}^{21}$ | 363.2(0) | 5.0(0) | 0.0(0)  |
| $B_{1g}^9$    | 152.9(2) | 4.7(0) | -0.1(0) | $B_{2g}^{21}$ | 369.4(0) | 5.3(0) | -0.1(0) |
| $B_{1g}^{10}$ | 155.2(1) | 5.1(1) | 0.0(0)  | $B_{3g}^{22}$ | 370.3(0) | 5.3(0) | -0.1(0) |
| $A_g^8$       | 160.2(1) | 3.2(2) | 0.0(0)  | $B_{1g}^{20}$ | 371.8(0) | 5.8(0) | -0.1(0) |
| $B_{3g}^{11}$ | 166.4(2) | 1.7(0) | 0.0(0)  | $B_{2g}^{22}$ | 374.7(0) | 5.4(0) | -0.1(0) |
| $B_{1g}^{11}$ | 163.2(1) | 4.3(0) | 0.0(0)  | $A_g^{18}$    | 379.2(0) | 5.6(0) | -0.1(0) |
| $B_{2g}^{11}$ | 160.9(2) | 2.8(0) | 0.2(0)  | $A_g^{19}$    | 380.0(0) | 6.1(0) | -0.1(0) |
| $B_{3g}^{12}$ | 162.8(1) | 4.7(0) | 0.0(0)  | $B_{1g}^{21}$ | 381.5(0) | 5.3(0) | 0.0(0)  |

---

**Table S6**

Theoretical Raman-active frequencies at 16 GPa ( $\omega_{16}$ , in  $cm^{-1}$ ) and pressure coefficients ( $a_1$ , in  $cm^{-1}GPa^{-1}$ ;  $a_2$ , in  $cm^{-1}GPa^{-2}$ ) in  $Pb_6Ga_{10}S_{21}$  according to fits to  $\omega_{16}+a_1\cdot(P-16)+a_2\cdot(P-16)^2$ .

| Mode | $\omega_0$ | $a_1$   | $a_2$    |
|------|------------|---------|----------|
| Bg   | 43.5 (0)   | 2.0 (0) | -0.1 (0) |
| Bg   | 49.4 (0)   | 2.6 (0) | -0.1 (0) |
| Ag   | 48.0 (0)   | 0.4 (0) | 0 (0)    |
| Ag   | 54.4 (0)   | 0.9 (0) | 0 (0)    |
| Ag   | 56.4 (0)   | 0.5 (0) | 0 (0)    |
| Bg   | 59.6 (0)   | 1.1 (0) | 0 (0)    |
| Bg   | 67.7 (0)   | 1.0 (0) | 0 (0)    |
| Ag   | 74.0 (0)   | 0.7 (0) | 0 (0)    |
| Ag   | 84.3 (0)   | 1.3 (0) | 0 (0)    |
| Bg   | 85.6 (0)   | 1.2 (0) | 0 (0)    |
| Bg   | 89.3 (0)   | 1.4 (0) | 0 (0)    |
| Ag   | 91.9 (0)   | 0.8 (0) | 0 (0)    |
| Ag   | 94.7 (0)   | 0.9 (0) | 0 (0)    |
| Bg   | 100.8 (0)  | 0.7 (0) | 0 (0)    |
| Ag   | 103.1 (0)  | 1.0 (0) | 0 (0)    |
| Ag   | 113.4 (0)  | 1.2 (0) | 0 (0)    |
| Bg   | 116.7 (0)  | 1.2 (0) | 0 (0)    |
| Ag   | 124.5 (0)  | 1.3 (0) | 0 (0)    |
| Ag   | 137.6 (0)  | 1.5 (0) | 0 (0)    |
| Ag   | 142.6 (0)  | 1.7 (0) | 0 (0)    |
| Bg   | 161.2 (0)  | 2.9 (0) | 0 (0)    |
| Ag   | 162.0 (0)  | 1.1 (0) | 0 (0)    |
| Ag   | 177.2 (0)  | 1.9 (0) | 0 (0)    |
| Ag   | 183.7 (0)  | 1.3 (0) | 0 (0)    |
| Ag   | 187.8 (0)  | 1.5 (0) | 0 (0)    |
| Ag   | 204.8 (0)  | 2.0 (0) | 0 (0)    |
| Bg   | 216.4 (0)  | 3.0 (0) | 0 (0)    |
| Ag   | 217.9 (0)  | 2.2 (0) | 0 (0)    |
| Ag   | 226.9 (0)  | 3.0 (0) | 0 (0)    |
| Bg   | 242.7 (0)  | 3.3 (0) | 0 (0)    |
| Ag   | 241.7 (0)  | 2.5 (0) | 0 (0)    |
| Bg   | 252.0 (0)  | 2.9 (0) | 0 (0)    |
| Bg   | 259.0 (0)  | 3.1 (0) | 0 (0)    |
| Ag   | 266.0 (0)  | 2.9 (0) | 0 (0)    |
| Bg   | 270.1 (0)  | 3.2 (0) | 0 (0)    |
| Ag   | 271.3 (0)  | 2.9 (0) | 0 (0)    |
| Ag   | 279.6 (0)  | 2.6 (0) | 0 (0)    |
| Bg   | 283.2 (0)  | 3.0 (0) | 0 (0)    |
| Ag   | 284.9 (0)  | 2.9 (0) | 0 (0)    |
| Bg   | 291.2 (0)  | 2.7 (0) | 0 (0)    |
| Ag   | 292.8 (0)  | 2.3 (0) | 0 (0)    |
| Bg   | 297.8 (0)  | 2.8 (0) | 0 (0)    |

|                |           |         |       |
|----------------|-----------|---------|-------|
| B <sub>g</sub> | 306.0 (0) | 3.9 (0) | 0 (0) |
| A <sub>g</sub> | 315.7 (0) | 2.7 (0) | 0 (0) |
| A <sub>g</sub> | 323.6 (0) | 2.5 (0) | 0 (0) |
| A <sub>g</sub> | 324.3 (0) | 2.9 (0) | 0 (0) |
| A <sub>g</sub> | 331.2 (0) | 2.7 (0) | 0 (0) |
| A <sub>g</sub> | 337.4 (0) | 2.7 (0) | 0 (0) |
| A <sub>g</sub> | 344.2 (0) | 2.7 (0) | 0 (0) |
| A <sub>g</sub> | 349.5 (0) | 3.1 (0) | 0 (0) |
| A <sub>g</sub> | 353.7 (0) | 2.6 (0) | 0 (0) |
| A <sub>g</sub> | 366.5 (0) | 3.3 (0) | 0 (0) |
| A <sub>g</sub> | 371.9 (0) | 4.1 (0) | 0 (0) |
| A <sub>g</sub> | 389.0 (0) | 2.9 (0) | 0 (0) |

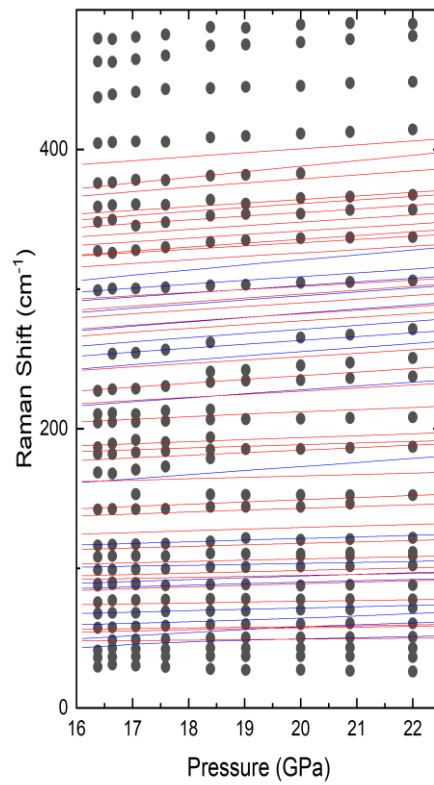

**Figure S5.** Pressure dependence of the experimental (symbols) and theoretical (lines) Raman frequencies of  $\text{Pb}_6\text{Ga}_{10}\text{S}_{21}$  during compression. The red (blue) lines correspond to the theoretical  $A_g$  ( $B_g$ ) modes.

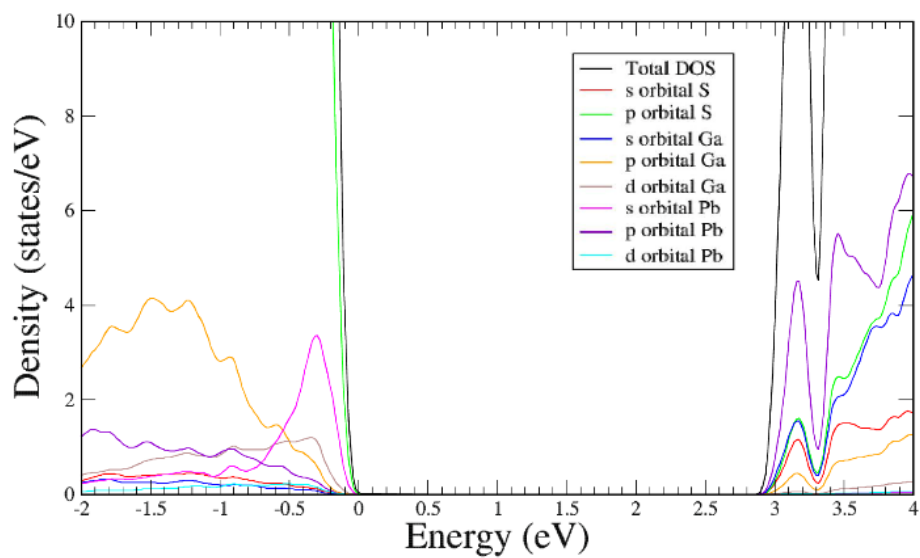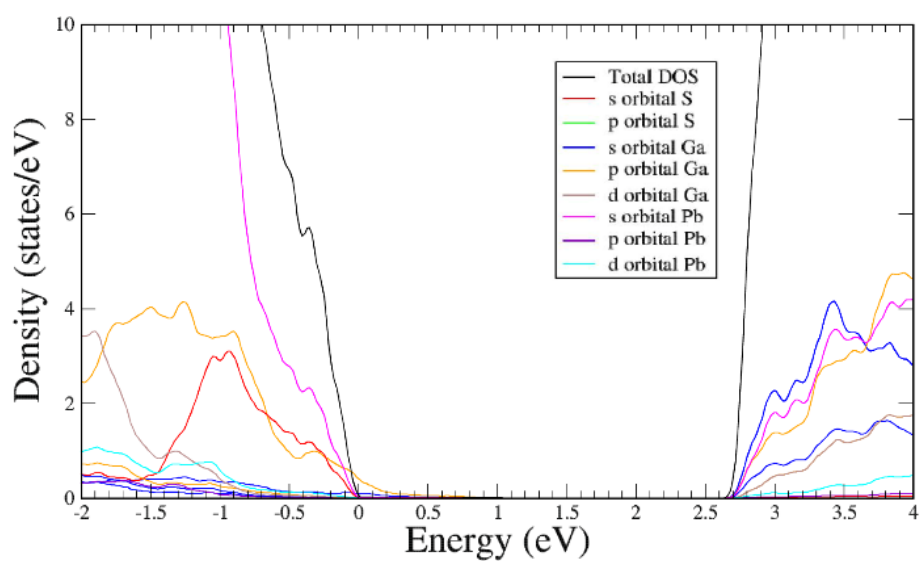

**Figure S6.** (Top) Zoom of the total and partial electronic density of states of  $\text{PbGa}_2\text{S}_4$  at 0 GPa. (Bottom) Zoom of the total and partial electronic density of states of  $\text{Pb}_6\text{Ga}_{10}\text{S}_{21}$  at 15.3 GPa

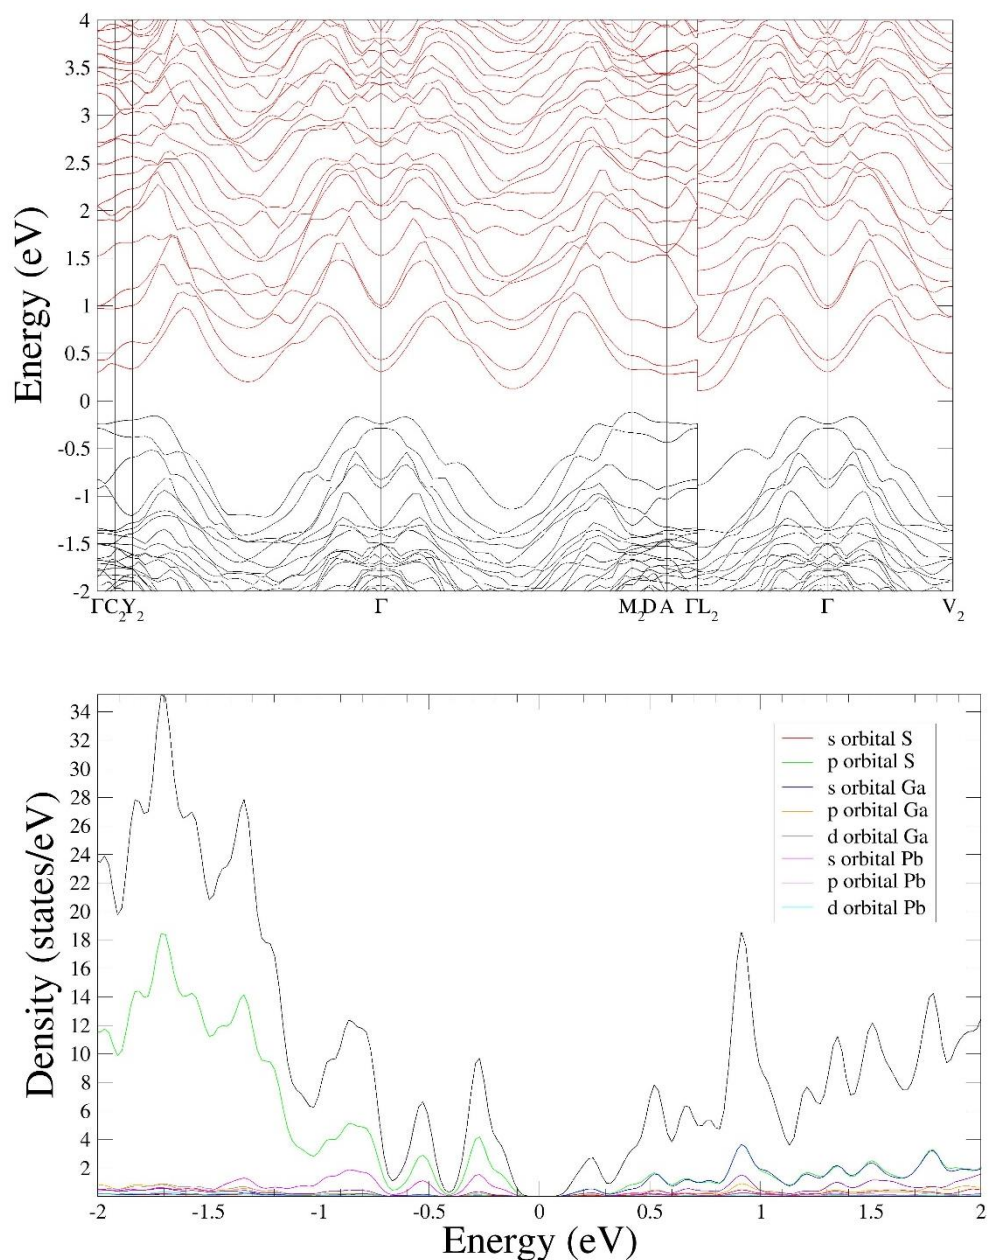

**Figure S7.** (Top) Electronic band structure of  $\text{Pb}_6\text{Ga}_{10}\text{S}_{21}$  at 15.3 GPa. (Bottom) Total and partial electronic density of states at 15.3 GPa

## Bibliography

- [S1] CrysAlisPro Software System, Rigaku Oxford Diffraction, (2020).
- [S2] Sheldrick, G.M., Crystal structure refinement with ShelXL, *Acta Cryst.*, (2015), **C71**, 3-8.
- [S3] Sheldrick, G.M., ShelXT-Integrated space-group and crystal-structure determination, *Acta Cryst.*, (2015), **A71**, 3-8.
- [S4] O.V. Dolomanov and L.J. Bourhis and R.J. Gildea and J.A.K. Howard and H. Puschmann, Olex2: A complete structure solution, refinement and analysis program, *J. Appl. Cryst.*, (2009), **42**, 339-341.
